# Supplementary material
Source: PubMed Central journal article supplement (PMC3346357)
Supplement: supp_78.10.3523_AEM07686-11_FigS1.pdf [file supp_78.10.3523_AEM07686-11_FigS1.pdf]

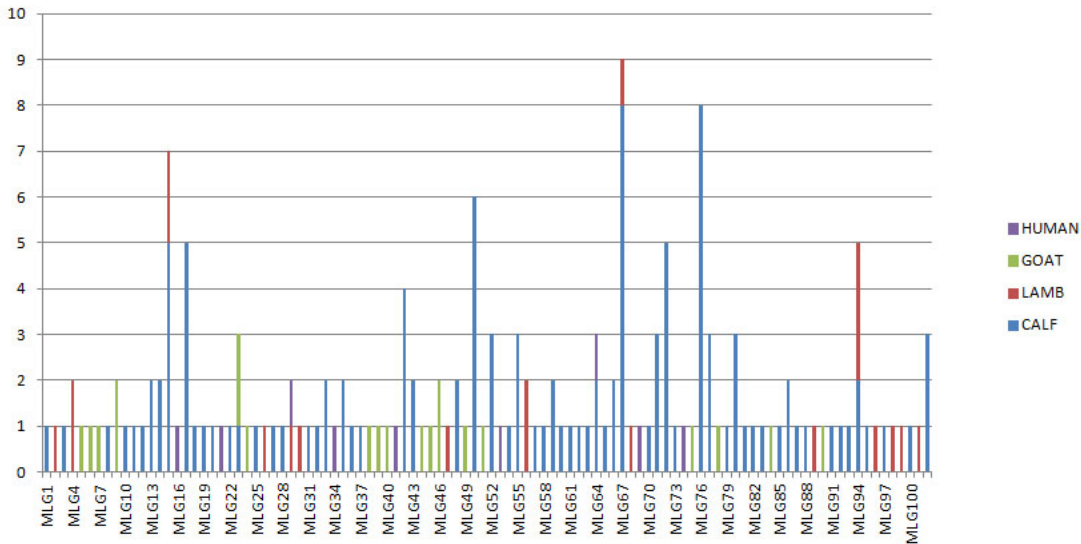

Supplementary Figure 1. Distribution and relative frequency of *C. parvum* MLGs in the four host species investigated.
