# Supplementary material
Source: PubMed Central journal article supplement (PMC3346357)

Supplementary Figure 2 Clustering of *C. parvum* MLGs using the Neighbor-Joining algorithm. MLGs are coloured according to host species.

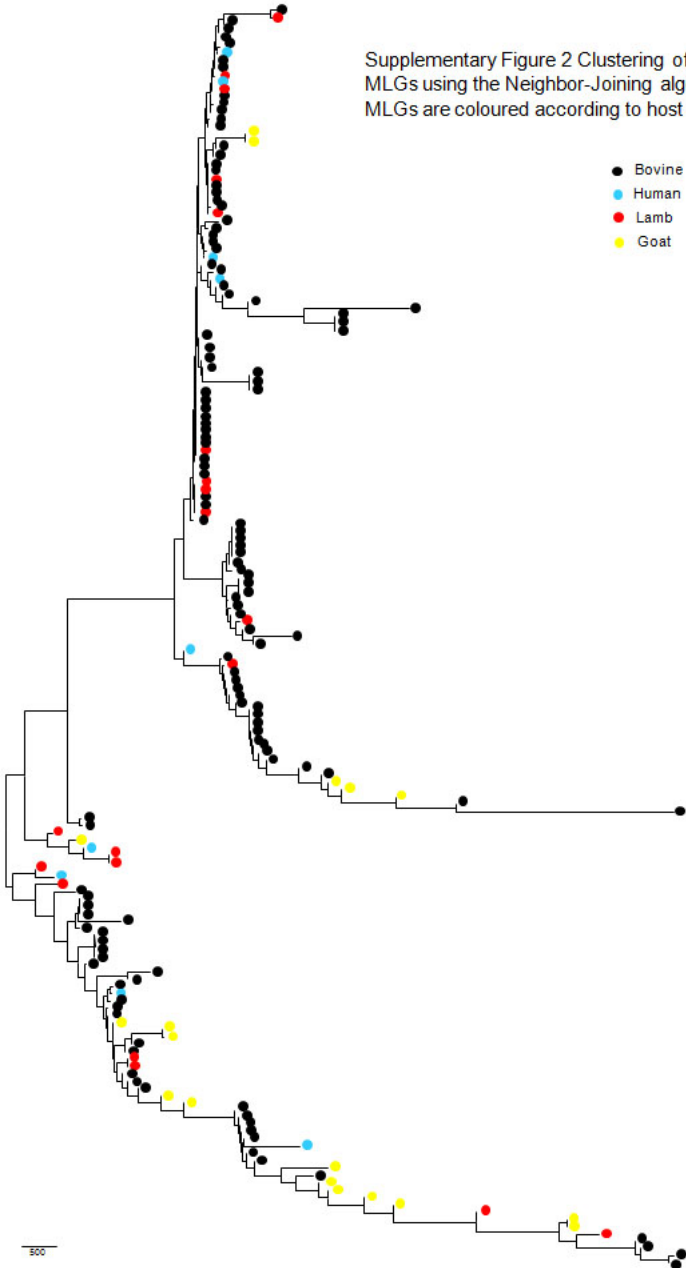

Supplement: supp_78.10.3523_AEM07686-11_FigS2.pdf [file supp_78.10.3523_AEM07686-11_FigS2.pdf]
